# Supplementary material
Source: publisher figshare collection journal article supplement (https://tandf.figshare.com/ndownloader/files/22824185)
Supplement: Supplementary file 1 [file 22824185]

**Appendix 1.- Bivariate regression analysis comparing women with preterm delivery before and after 32, 34 and 36 weeks.**

|  | **< 32 weeks (n=11)** | ≥ **32 weeks (n=166)** | **p** | **< 34 weeks (n=22)** | ≥ **34 weeks (n=155)** | **p** | **< 36 weeks (n=59)** | ≥ **36 weeks (n=118)** | **p** |
| --- | --- | --- | --- | --- | --- | --- | --- | --- | --- |
| **General characteristics** | |  |  |  |  |  |  |  |  |
| **Caucasian race**a | 10 (90.0) | 145 (87.3) | 1.000 | 20 (90.9) | 135 (87.1) | 1.000 | 47 (79.7) | 108 (91.5) | **0.024** |
| **Maternal age**b | 35.55 ± 5.48 | 35.04 ± 4.88 | 0.754 | 34 ± 4.74 | 35.23 ± 4.92 | 0.274 | 33.85 ± 4.88 | 35.69 ± 4.82 | **0.018** |
| **Maternal height(cm)**c | 160 (14) | 165 (10) | 0.08 | 165 (11) | 165 (10) | 0.307 | 165 (10.5) | 165 (10) | 0.224 |
| **Initial maternal weight** c | 55 (10.5) | 64 (13.1) | **0.008** | 64.7 (18.6) | 63 (12.8) | 0.711 | 63 (17) | 63.5 (12.2) | 0.600 |
| **Pregestational BMI** b | 20.63 ± 1.45 | 24.19 ± 3.64 | **0.032** | 23.58 ± 3.65 | 24.10 ± 3.66 | 0.643 | 24.25 ± 4.01 | 23.97 ± 3.51 | 0.697 |
| **Tobacco use**a | 3 (30) | 17 (10.2) | 0.09 | 4 (19) | 16 (10.3) | 0.267 | 7 (12.1) | 13 (11) | 0.836 |
| **Previous conization**a | 0 (0) | 3 (1.8) | 1.000 | 0 (0) | 3 (1.9) | 1.000 | 2 (3.4) | 1 (0.8) | 0.258 |
| **Reproductive history** |  |  |  |  |  |  |  |  |  |
| **Nulliparous** a | 8 (72.7) | 124 (74.7) | 1.000 | 17 (77.3) | 115 (74.2) | 1.000 | 39 (66.1) | 93 (78.8) | 0.067 |
| **Previous preterm birth**a | 1 (9.1) | 0 (0) | 0.062 | 1 (4.5) | 0 (0) | 0.124 | 1 (1.7) | 0 (0) | 0.333 |
| **Previous miscarriage**a | 3 (27.3) | 49 (29.5) | 1.000 | 7 (31.8) | 45 (29) | 0.788 | 16 (27.1) | 36 (30.5) | 0.641 |
| **Previous cesarean section**a | 0 (0) | 8 (4.8) | 1.000 | 0 (0) | 8 (5.2) | 0.598 | 1 (1.7) | 7 (5.9) | 0.272 |
| **ART**a | 6 (54.5) | 111 (66.9) | 0.512 | 12 (54.5) | 105 (67.7) | 0.221 | 35 (59.3) | 82 (69.5) | 0.178 |
| **IVF** a | 3 (27.3) | 71 (42.8) | 0.363 | 7 (31.8) | 67 (43.2) | 0.310 | 21 (35.6) | 53 (44.9) | 0.236 |
| **Oocyte donation** a | 2 (18.2) | 29 (17.5) | 1.000 | 3 (13.6) | 28 (18.1) | 0.770 | 9 (15.3) | 22 (18.6) | 0.576 |
| **Gestational characteristics** | |  |  |  |  |  |  |  |  |
| **Chorionicity** a   - **Monochorionic** - **Dichorionic** | 2 (18.2)  9 (81.8) | 19 (11.4)  147 (88.6) | 0.622 |  |  |  | 8 (16.3)  151 (86.4) | 13 (11.0)  105 (89) | 0.622 |
| 5 (22.7) | 16 (10.3) | 0.148 |
| 17 (77.3) | 139 (89.7) |  |
| **Final maternal weight**c | 60.19 ± 9.22 | 76.54 ± 11.62 | **<0.001** | 70.45 ± 13.63 | 76.35 ± 11.73 | 0.055 | 73.10 ± 13.52 | 76.93 ± 11.16 | 0.062 |
| **Weight change**b | 4.96 ± 3.89 | 11.70 ± 3.96 | **<0.001** | 8.25 ± 4.62 | 11.73 ± 4.02 | **0.001** | 9.59 ± 4.37 | 12.17 ± 3.89 | **<0.001** |
| **Cervical assessment at 19-22 weeks** | |  |  |  |  |  |  |  |  |
| **UCA**b | 115.72 ± 16.52 | 103.82 ± 18.08 | **0.035** | 114.32 ± 16.42 | 103.17 ± 18.03 | **0.007** | 107.64 ± 16.05 | 103.01 ± 19.02 | 0.110 |
| **CL**b | 34.8 ± 12.41 | 39.21 ± 5.85 | **0.034** | 36.67 ± 9.63 | 39.28 ± 5.83 | 0.08 | 37.78 ± 7.02 | 39.56 ± 6.06 | 0.085 |

ART: Assisted Reproduction Techniques; IVF: In Vitro Fertilization; BMI: Body Mass Index.

a Expressed as n (percentage).

b Expressed as median ± standard deviation.

c Expressed as median (interquartile range).
